# Supplementary material
Source: PubMed Central journal article supplement (PMC1479393)
Supplement: pmed.0030135.sd002.pdf [file pmed.0030135.sd002.pdf]

## **Translation of the abstract ("Pandemic Influenza: Risk of Multiple Introductions and the Need to Prepare for Them") into Thai by Pantipa Rakkuson, Warakan Poomkumarn and Christina E. Mills**

การระบาดของเชื้อไข้หวัดนกนี้อาจเกิดขึ้นได้ในระยะเริ่มต้นของการติดเชื้อหากเชื่อนั้นคือ H5N1 แต่หากมีการติดเชื้อที่แพร่ระบาดชนิดความช้อนหลายตัวก็อาจเป็นไปได้ยากขึ้น อย่างไรก็ตามการติดเชื้อระบาดชนิดความช้อนนี้มีโอกาสเกิดขึ้นได้โดยเฉพาะอย่างยิ่งเมื่ออยู่ในภาวะอันตรายต่อการระบาดสูงดังที่เป็นที่ยอมรับในขณะนี้ และเนื่องด้วยจำนวนชนิดของเชื้อที่สามารถความช้อนได้นี้มีมากขึ้น โอกาสที่การควบคุมการระบาดอย่างใดอย่างหนึ่งจะล้มเหลวก็ยังมีมากตามไปด้วย เราได้ประเมินถึงข้อดีของยุทธการควบคุมการระบาดอันเนื่องมาจากการเพิ่มขึ้นของระยะเวลาที่จะถึงช่วงการระบาดภายใต้สมมติฐานที่แตกต่างกันเกี่ยวกับยุทธการการควบคุมการระบาดและอัตราของเชื้อที่สามารถความช้อน ซึ่งสมมติฐานที่สามารถเป็นไปได้มากที่สุดคือ นโยบายการควบคุมการระบาดอาจทำได้เพียงยี่ดระยะเวลาจนกว่าจะเกิดการระบาดขึ้นเป็นสองเท่า สรุปได้ว่าการวางแผนการควบคุมการระบาดนี้ควรรวมถึงแผนการที่ชัดเจนเกี่ยวกับวิธีการวัดผลที่รัดกุมในอันที่จะลดความเสี่ยงของเชื้อโรคที่อาจเกิดขึ้นในภายหลังซึ่งรวมถึงการฆ่าสัตว์ในวงกว้างเพื่อป้องกันการระบาดและการเปลี่ยนวิธีการทำเกษตรกรรมอันอาจเกิดขึ้นได้เมื่อมีการระบาดของเชื้อ
